# Diversity in Clinical and Biomedical Research: A promise yet to be fulfilled

Sam S. Oh<sup>1</sup>, Joshua Galanter<sup>1,2</sup>, Neeta Thakur<sup>1</sup>, Maria Pino-Yanes<sup>1,3,4</sup>, Nicolas E. Barcelo<sup>1</sup>, Marquitta J. White<sup>1</sup>, Danielle M. de Bruin<sup>1</sup>, Ruth M. Greenblatt<sup>1,5</sup>, Kirsten Bibbins-Domingo<sup>1,6</sup>, Alan H.B. Wu<sup>7</sup>, Luisa N. Borrell<sup>8</sup>, Chris Gunter<sup>9,10</sup>, Neil R. Powe<sup>1,6,8</sup>, and Esteban G. Burchard<sup>1,2,§,\*</sup>

<sup>§</sup>These authors contributed equally to this manuscript.

<sup>1</sup> Department of Medicine, University of California, San Francisco, San Francisco, CA

<sup>2</sup> Department of Bioengineering and Therapeutic Sciences, University of California, San Francisco, San Francisco, CA

<sup>3</sup> CIBER de Enfermedades Respiratorias, Instituto de Salud Carlos III, Madrid, Spain

<sup>4</sup> Research Unit, Hospital Universitario N.S. de Candelaria, Tenerife, Spain

<sup>5</sup> Departments of Clinical Pharmacy, Epidemiology, and Biostatistics, University of California, San Francisco, San Francisco, CA

<sup>6</sup> Department of Medicine, San Francisco General Hospital, San Francisco, CA

<sup>7</sup> Department of Laboratory Medicine, University of California, San Francisco, San Francisco, CA

<sup>8</sup> School of Health Sciences, Human Services and Nursing, Department of Health Sciences, Lehman College, City University of New York

21 <sup>9</sup> Marcus Autism Center, Children’s Healthcare of Atlanta, Atlanta, GA

22 <sup>10</sup> Department of Pediatrics, Emory University School of Medicine, Atlanta, GA

23

24 \* [esteban.burchard@ucsf.edu](mailto:esteban.burchard@ucsf.edu)

25

26 **Article type:** Policy Forum

27 **Key words:** NIH, funding, racial and ethnic minorities, health equality, Revitalization  
28 Act

29 **Funding:** This study was supported in part by National Institutes of Health R01-  
30 HL117004 and HL104608 grants, the RWJF Amos Medical Faculty Development  
31 Award, the Sandler Foundation and the American Asthma Foundation to EGB, and the  
32 National Institute On Minority Health And Health Disparities under Award Number  
33 P60 MD006902 and R25MD006832. SSO was in part supported by the Flight  
34 Attendant Medical Research Institute. MP-Y was funded by a Postdoctoral Fellowship  
35 from Fundación Ramón Areces ([www.fundacionareces.es](http://www.fundacionareces.es)). JMG was supported in part  
36 by NIH Training Grant T32 (GM007546) and career development awards from the  
37 National Heart, Lung and Blood Institute (K23HL111636) and NCATS KL2  
38 (KL2TR000143), as well as the Hewett Fellowship. R.M.G was supported by the  
39 National Institutes of Health (U01AI034989, 5K12HD052163, P01 AI083050-02, R01-  
40 A122590, R01-A123240) and The J. David Gladstone Institutes (P01 AI083050-02). The

41 content of this publication is solely the responsibility of the authors and does not  
42 necessarily reflect the views or policies of the Department of Health and Human  
43 Services, nor does mention of trade names, commercial products, or organizations imply  
44 endorsement by the U.S. Government.

45 **Word count: 2,805**

## Summary Points

- Health disparities persist across race/ethnicity for the majority of *Healthy People 2010* health indicators.
- Most physicians and scientists are informed by research extrapolated from a largely homogenous population, usually White and male.
- A growing proportion of Americans are not fully benefiting from clinical and biomedical advances since racial and ethnic minorities make up nearly 40% of the U.S. population.
- Ignoring the racial/ethnic diversity of the U.S. population is a missed scientific opportunity to fully understand the factors that lead to disease or health.
- U.S. biomedical research and study populations must better reflect the country's changing demographics. Adequate representation of diverse populations in scientific research is imperative as a matter of social justice, economics, and science.

In 1993, the National Institutes of Health (NIH) Revitalization Act was passed by United States (U.S.) Congress and signed into law by President Clinton [1]. The Act called for the NIH to require that all federally-funded clinical research prioritize the inclusion of women and minorities and that research participant characteristics be disclosed in research documentation [1]. When pivotal NIH-funded studies included large proportions of women by design, they made important, clinically relevant scientific contributions by identifying sex-specific differences in symptoms, pathologies, and treatment response [2-4]. In continuation of this effort, the NIH announced new measures to enhance gender equity [5]. Herein, we evaluate the impact of the Revitalization Act's other stated aim: diversifying study populations by race/ethnicity. We also make suggestions on what we believe will bolster the Revitalization Act's effect in shaping clinical and biomedical research and thereby provide guidance for President Obama's new Precision Medicine Initiative (PMI) [6].

### **Disease pattern, clinical presentation, and therapeutic response can vary dramatically by race/ethnicity and ancestral background**

Race is a social construct rooted in cultural identity and shaped by historic and current events, which influence an individual's behavior and place of residence. Genetic variation correlates with self-identified race [7], and this genetic variation also correlates with clinical presentation and therapeutic response. Thus, while not every study needs to examine racial differences or include all racial/ethnic groups, we feel that the group(s) included should be representative of their larger population(s) such that including an adequate proportion of racially/ethnically diverse groups in clinical and

biomedical research can provide meaningful opportunities to examine the complex relationship of ancestral influences, environmental exposures, and social factors. In turn, understanding the interaction between the social and environmental milieu with an individual's genomic profile and genetic ancestry can extend our understanding of disease pathology and expand therapeutic options for everyone [8]. For example, up to 75% of Pacific Islanders are unable to convert the antiplatelet drug clopidogrel into its active form and are at higher risk for adverse outcomes following angioplasty [9,10]. Other examples are listed in Table 1.

**Table 1.** Insights from studies conducted in diverse race/ethnic groups.

| <b>Trait</b>                 | <b>Findings</b>                                                                                                                                                                                                                                                                                        |
|------------------------------|--------------------------------------------------------------------------------------------------------------------------------------------------------------------------------------------------------------------------------------------------------------------------------------------------------|
| Breast cancer                | Differences in Native American ancestry at the estrogen receptor locus led to discovery of a genetic variant that was protective against breast cancer in Latinas [11].                                                                                                                                |
| Heart failure                | A post-hoc analysis of clinical trials of fixed-dose combination of hydralazine and isosorbide dinitrate suggested that Black, but not White patients had a significant reduction in mortality compared to placebo [12].                                                                               |
| Increased preterm birth rate | Exposures to endocrine disrupting chemicals such as bisphenol-A (BPA) are more common among minorities who live in low socioeconomic strata. BPA causes epigenetic alterations of the germ line resulting in increased preterm birth rate; these alterations can pass down to future generations [13]. |
| Stevens-Johnson syndrome     | The risk of carbamazepine-induced Stevens-Johnson syndrome due to HLA-B*1502 is highest in populations of Southeast Asian and East Asian ancestry [14].                                                                                                                                                |
| Kidney disease               | Genetic variants of <i>APOL1</i> have been associated                                                                                                                                                                                                                                                  |

with kidney disease in individuals of African ancestry whose ancestors lived in regions of Africa endemic with trypanosomiasis; these renal risk variants are largely absent in individuals of European or Asian ancestry [15].

Response to efavirenz

Blood levels and treatment response to this antiretroviral drug are influenced by individual ancestral make up, which can be accounted for by polymorphisms of cytochrome 2B6 and genetically defined ancestry [16,17].

91

## 92 **Past research has under-studied minorities**

93 The U.S. has been regarded as a “global lead” and “exemplar” in biomedical and clinical  
 94 health research since the end of the Cold War [18]. Yet, few U.S. biomedical studies  
 95 focus recruitment efforts on attaining adequate minority representation nor their  
 96 research attention to factors most relevant to minority health [19]. Since the passage of  
 97 Revitalization Act in 1993, less than 2% of more than 10,000 cancer clinical trials  
 98 funded by the National Cancer Institute included enough minority participants to meet  
 99 the NIH’s own criteria and goals [20]. Moreover, less than 5% of NIH-funded  
 100 respiratory research reported inclusion of racial/ethnic minorities [21]. Minority  
 101 enrollment in cancer clinical trials remains inadequate despite striking racial/ethnic  
 102 disparities in cancer incidence and mortality [22,23]. Similar incongruities between  
 103 disease burden and representation in biomedical research exist for cardiovascular  
 104 diseases and diabetes [24,25]. These disparities have economic consequences:  
 105 eliminating racial/ethnic health disparities would have reduced total medical costs  
 106 during 2003-2006 by more than \$1.2 trillion [26]. Some NIH reviewers have argued  
 107 that the inclusion of diverse groups will increase the financial costs of clinical and

biomedical research. However, it is generally agreed upon that the long-term financial benefits outweigh short-term expenses [27]. The social, biomedical and economic costs of inaction are ameliorated by a new appreciation for the clinical and biomedical benefits achieved through precision medicine when applied to all populations [6]. The proportion of taxpayers who have not gained optimal benefit from scientific discoveries they are funding continues to grow with the changing U.S. demographics. Therefore, ensuring that diverse populations are adequately included in scientific research is imperative not only in terms of scientific integrity and fiduciary responsibility, but also as a matter of social justice.

# **Barriers to diversify research need concerted attention**

While U.S. minorities may be as willing to participate in health research as non-Hispanic whites [28], barriers to participation among minority populations must be addressed and will require buy-in from stakeholders: funders, academic institutions, investigators, and potential research participants [29]. Minority populations often have limited access to specialty care centers that serve as referral sources for clinical studies, resulting in a lack of an effective referral base [30]. Other barriers include, but are not limited to, fears of exploitation in medical research [31], financial constraints [32], competing demands of time, lack of access to information and comprehension about research, unique cultural and linguistic differences, fears of unintended outcomes, stigmatization, and health care discrimination [31].

Highly feasible changes can increase minority participation despite the challenges described. Ideally, investigators would reflect the communities being studied. Given the



tremendous disparities in our biomedical workforce, we must seek out other realistic solutions. For example, some participants prefer studies that include research staff who share their same culture and with whom they can communicate in their own language [31]. Potential contributors are also more likely to partake when recruited by research staff they personally know or with whom they identify [33,34]. Town hall meetings and study newsletters can be adapted to the language and reading level requirements of target groups; these can describe how collected data will be used, ensuring transparency and allaying fears stemming from lack of information [29]. Challenges of transportation, childcare, work hour considerations, and meals can be addressed via payment, travel support, flexible recruitment hours and locations, provision of food during study visits, and positioning study sites in areas with diverse residents. To compensate for the limited internal referral base, tertiary care centers can partner with community healthcare providers. Targeted advertising (e.g., on public transportation) can reach potential participants at a moderate cost. Nonetheless, outreach and external partnerships introduce costs and effort that can raise recruitment budgets. The Revitalization Act specifically prohibits cost considerations from being a reason to exclude minorities, and NIH study sections are instructed to disregard budgetary requests in evaluating a project's scientific merit. However, our experience in grant reviewing has been that in practice, the size of budgetary requests can bias reviewers. Grant applicants, in turn, react by submitting proposals with inadequate budgets to recruit minority participants so as not to "raise eyebrows" of reviewers.

Minorities would likely to be as willing to be involved in research as whites if problems of diversity could be better addressed. Some of these problems may stem from issues

within the research community and its own profound diversity gap. Minority physicians and scientists are more likely to conduct research in minority populations and are often best suited to gain the trust of minority communities, but they are also significantly underrepresented in medical and scientific communities [35]. For example, Blacks or African Americans and Hispanics respectively represented only 4.3% and 7.2% of doctorate degree awardees in biomedical sciences in 2013 although they represented 13.2% and 17.1% of the U.S. population during the same period [36]. Moreover, less than 2% of NIH principal investigators on research project grants are Black [37], a proportion much lower than in the general U.S. population (10.2%) [38]. Similar disparities were observed for Latinos (3.4% vs. 12.5%), American Indians and Alaska Natives (0.4% vs. 0.7%), and Native Hawaiians and Other Pacific Islanders (1.2% vs. 10.2%).

To further complicate the picture, an NIH study of research grant awards found that the proportion of applications funded was 13% lower for Blacks or African Americans and 4% lower for Asians than among Whites [39]. According to demographic information provided by the NIH's Office of Extramural Research under the Freedom of Information Act, the award rate for RO1 or equivalent grants has been consistently lower among non-White applicants (Pacific Islander, Native Hawaiian, African American, American Indian, and Asian) than White applicants (42.1% versus 48.6% in 1985 and 19.3% versus 23.3% in 2013) [40].

Contributors to funding disparities arise throughout the research application review process [41]. The NIH has commented on reviewer bias [42], acknowledging that the probability of funding after peer review does not differ by race, but that minority

investigators tend to receive lower priority scores from peer review, indicating that the review process is biased against applications from minority investigators. The relative absence of minority participants throughout the research application evaluation process may contribute to this problem, since underrepresented minorities comprised 10% of NIH study section reviewers in 2000 and only 10.9% in 2013 [40]. Increasing minority representation within the research community could in itself promote better science. Diverse research teams are more likely to have diverse ideas [43], which may explain why manuscripts authored by multi-ethnic research teams are more likely to be cited than publications authored by authors of the same ethnicity [44]. However, since study section members are drawn from the pool of successfully funded researchers, funding disparities have a self-perpetuating effect [45] and functionally eliminate scientists best suited to respond to the call to action we describe.

### **How can the NIH (re)catalyze diversity in research?**

The Revitalization Act intended to re-catalyze diversity in biomedical research by increasing minority representation. President Obama's Precision Medicine Initiative plans to enroll a cohort of one million or more Americans that will provide the platform for expanding our knowledge and benefit the nation for many years to come. It is time to heed to the President's call to action given the changing U.S. demographics. The NIH should be empowered to set and enforce recruitment of diverse research populations as the default and require scientific justification for limited or selected study population enrollment, as they have just set policies to do for sex balance [5]. Other U.S. government agencies (e.g., Centers for Disease Control and Prevention, Food and Drug

Administration, Agency for Healthcare Research and Quality, Patient-Centered Outcomes Research Institute, Department of Defense) should be similarly empowered. Recruitment approaches should be formally included as criteria for scientific merit scoring, rather than the current application of such criteria after scoring.

In this vein, the NIH should include race/ethnicity as a criterion for assigning priority scores to ensure that well-characterized cohorts and clinical trials not only answer questions relevant to the growing diversity of the U.S. population but are also appropriately statistically powered. The same techniques for monitoring sex/gender inclusion [5] should be used to explicitly review minority accruals over the course of the award, and adjust funding levels accordingly. We believe this would prompt researchers of all racial/ethnic and cultural backgrounds to incorporate understudied populations in their research studies.

To their credit, the NIH is actively addressing many of the issues we have mentioned. Following President Obama's PMI announcement during his 2015 State of the Union address, the NIH has actively solicited feedback [46] to help guide creation of a diverse research cohort of 1 million or more Americans [47]. The NIH has since hosted several workshops to develop a vision for building the national PMI cohort, and maximizing cohort diversity (across socioeconomic standing, geography, sexual orientation, education, and age, in addition to race/ethnicity) has been an ongoing topic at these workshops [48]. In particular, participant and public engagement, diversity and inclusion, and health disparities considerations for the development of a national

research cohort were among the topics discussed at a workshop dedicated to participant engagement and health equity [49].

We applaud and encourage the NIH's focus on diversifying the makeup of the forthcoming PMI cohort. To build on these efforts, an administrative supplement for currently funded research to investigate racial/ethnic differences in health and therapeutics should be created, similar to efforts by the Office of Research on Women's Health to promote discovery of sex differences [50]. This supplement would be hypothesis-generating and show the NIH's commitment to diversify study populations throughout all Institutes. The NIH should also incentivize collaboration amongst groups with similar approaches and data elements so that adequately powered analyses can examine racial/ethnic differences.

Applications from minority-serving institutions should be judged on their capacity to conduct research rather than relying on the institutions' research track records. In our experience, applications from institutions with strong community ties are better equipped to enroll and retain subjects in clinical and biomedical research. The importance and novelty of studies focused primarily or solely on minority populations should be recognized for their validity and worth, as these may be the only studies to recruit sufficient minority participants to determine whether research findings can be generalized to these populations.

Given the systemic bias against minority scientists, the solution does not lie in simply increasing the number of competitive applicants. To this end, the NIH is actively funding investigations to understand and eliminate discrepancies for minority

investigators in the peer review process [51]. In September 2014, the NIH announced [52] winners of two competitions on increasing the fairness and impartiality of the scientific review process and for novel methods of identifying bias. A program assessing the complete anonymization of grant applications is also being piloted [53]. These efforts are part of a larger campaign to identify and root out unconscious bias in peer review [41,51]. The NIH must act on these data to ensure a just and fair voice for all stakeholders.

NIH proposals passing scientific peer review are forwarded to a second level of review, conducted by Institute and Center (IC) National Advisory Councils or Boards (henceforth referred to as “Councils”). NIH Councils make funding decisions based on the priority score and the priorities of the IC, which have varying levels of discretionary funds. A reasonable way to fund meritorious applications that reflect the diversity priorities of the ICs is to use the discretion of the Councils. Other NIH efforts to increase support for the diversity pipeline (e.g., BUILD [54]) and for diversity-related scientific initiatives are commendable, but in the absence of strong changes throughout the review process, research will continue to suffer.

## **Inclusive research needs the support of the entire country**

Efforts by the NIH and other agencies to address disparities in research priorities will have limited impact unless broader themes of political and economic inequality are addressed. The most important changes in our approach to science will only come when we consider inclusion and diversity important by default—not just in biomedical science, but in all aspects of society. Homogeneity in study populations will cease when

racial/ethnic and socioeconomic diversity are considered socially desirable and social norms [55], be it in study populations, academic faculty, NIH study sections, or boardrooms and classrooms.

We have suggested a number of measures for the NIH to build upon the Revitalization Act. Despite the Act's stipulation that cost not be used as justification for failure to enroll diverse populations, no discussion of new mandates for NIH-funded research can take place without addressing the crisis of declining inflation-adjusted NIH budgets. Society and patients will benefit when the NIH exercises the full scope of power provided under the 1993 Act: a call for the inclusion of historically under-represented communities in clinical research. The NIH alone will not be able to correct the disparities or inequities of the healthcare system, but it can send a powerful message that may promote changes in our health care and health science systems. There must be a collective will to prioritize diversifying our study populations, rallied by outreach to the lay community to educate voters who can exercise their franchise to their own best healthcare interests.

Fulfilling the promise of the Revitalization Act does not pit a future of precision medicine and the advancement of science against the realization of social justice for under-represented communities. Rather, the choice to study diverse populations is itself a promising path toward sound science. By reprioritizing our approach to clinical research and recruitment, we may accomplish an even greater goal: to usher in a new era of scientific discovery and health prosperity for all citizens of the world.

## 283    **References**

- 284    1.    U.S. Congress. National Institutes of Health Revitalization Act of 1993: Act to  
285        Amend the Public Health Service Act to Revise and Extend the Programs of the  
286        National Institutes of Health, and for Other Purposes. Public Law Washington,  
287        DC; 1993 pp. 103–143.
- 288    2.    Canto JG, Goldberg RJ, Hand MM, Bonow RO, Sopko G, Pepine CJ, et al.  
289        Symptom presentation of women with acute coronary syndromes: myth vs reality.  
290        Archives of internal medicine. 2007;167: 2405–2413.  
291        doi:10.1001/archinte.167.22.2405
- 292    3.    Gandhi M, Aweeka F, Greenblatt RM, Blaschke TF. Sex differences in  
293        pharmacokinetics and pharmacodynamics. Annu Rev Pharmacol Toxicol.  
294        2004;44: 499–523. doi:10.1146/annurev.pharmtox.44.101802.121453
- 295    4.    Rathore SS, Wang Y, Krumholz HM. Sex-based differences in the effect of digoxin  
296        for the treatment of heart failure. N Engl J Med. 2002;347: 1403–1411.  
297        doi:10.1056/NEJMoA021266
- 298    5.    Clayton JA, Collins FS. Policy: NIH to balance sex in cell and animal studies.  
299        Nature. 2014;509: 282–283.
- 300    6.    Remarks by the President in State of the Union Address | January 20, 2015. 2015.  
301        Available: [https://www.whitehouse.gov/the-press-office/2015/01/20/remarks-](https://www.whitehouse.gov/the-press-office/2015/01/20/remarks-president-state-union-address-january-20-2015)  
302        [president-state-union-address-january-20-2015](https://www.whitehouse.gov/the-press-office/2015/01/20/remarks-president-state-union-address-january-20-2015)
- 303    7.    Burchard EG, Ziv E, Coyle N, Gomez SL, Tang H, Karter AJ, et al. The importance  
304        of race and ethnic background in biomedical research and clinical practice. N Engl  
305        J Med. 2003;348: 1170–1175. doi:10.1056/NEJMSb025007
- 306    8.    Kaufman JS, Cooper RS, McGee DL. Socioeconomic status and health in blacks  
307        and whites: the problem of residual confounding and the resiliency of race.  
308        Epidemiology. 1997;8: 621–628.
- 309    9.    Wu AH, White MJ, Oh SS, Burchard E. The Hawaii clopidogrel lawsuit: the  
310        possible effect on clinical laboratory testing. Per Med. 2015;12: 179–181.  
311        doi:10.2217/pme.15.4
- 312    10.    Mega JL, Simon T, Collet J-P, Anderson JL, Antman EM, Bliden K, et al.  
313        Reduced-function CYP2C19 genotype and risk of adverse clinical outcomes among  
314        patients treated with clopidogrel predominantly for PCI: a meta-analysis. JAMA:  
315        The Journal of the American Medical Association. 2010;304: 1821–1830.  
316        doi:10.1001/jama.2010.1543
- 317    11.    Fejerman L, Ahmadiyeh N, Hu D, Huntsman S, Beckman KB, Caswell JL, et al.  
318        Genome-wide association study of breast cancer in Latinas identifies novel



- 319 protective variants on 6q25. Nat Commun. 2014;5: 5260.  
320 doi:10.1038/ncomms6260
- 321 12. Carson P, Ziesche S, Johnson G, Cohn JN. Racial differences in response to  
322 therapy for heart failure: analysis of the vasodilator-heart failure trials.  
323 Vasodilator-Heart Failure Trial Study Group. J Card Fail. 1999;5: 178–187.
- 324 13. Ranjit N, Siefert K, Padmanabhan V. Bisphenol-A and disparities in birth  
325 outcomes: a review and directions for future research. J Perinatol. 2010;30: 2–9.  
326 doi:10.1038/jp.2009.90
- 327 14. Chung W-H, Hung S-I, Hong H-S, Hsieh M-S, Yang L-C, Ho H-C, et al. Medical  
328 genetics: a marker for Stevens-Johnson syndrome. Nature. 2004;428: 486–486.  
329 doi:10.1038/428486a
- 330 15. Genovese G, Friedman DJ, Ross MD, Lecordier L. Association of trypanolytic  
331 ApoL1 variants with kidney disease in African Americans. Science. 2010.  
332 doi:10.1126/science.1193032
- 333 16. Gandhi M, Greenblatt RM, Bacchetti P, Jin C, Huang Y, Anastos K, et al. A single-  
334 nucleotide polymorphism in CYP2B6 leads to >3-fold increases in efavirenz  
335 concentrations in plasma and hair among HIV-infected women. The Journal of  
336 infectious diseases. 2012;206: 1453–1461. doi:10.1093/infdis/jis508
- 337 17. Frasco MA, Mack WJ, Van Den Berg D, Aouizerat BE, Anastos K, Cohen M, et al.  
338 Underlying genetic structure impacts the association between CYP2B6  
339 polymorphisms and response to efavirenz and nevirapine. AIDS. 2012;26: 2097–  
340 2106. doi:10.1097/QAD.obo13e3283593602
- 341 18. Bhopal RS. Migration, Ethnicity, Race, and Health in Multicultural Societies. 2nd  
342 ed. Oxford University Press; 2014.
- 343 19. Institute of Medicine (US) Committee on the Review and Assessment of the NIH's  
344 Strategic Research Plan and Budget to Reduce and Ultimately Eliminate Health  
345 Disparities. Examining the Health Disparities Research Plan of the National  
346 Institutes of Health: Unfinished Business. Thomson GE, Mitchell F, Williams MB,  
347 editors. Washington (DC): National Academies Press (US); 2006.
- 348 20. Chen MS, Lara PN, Dang JHT, Paterniti DA, Kelly K. Twenty years post-NIH  
349 Revitalization Act: enhancing minority participation in clinical trials (EMPaCT):  
350 laying the groundwork for improving minority clinical trial accrual: renewing the  
351 case for enhancing minority participation in cancer clinical trials. Cancer.  
352 2014;120 Suppl 7: 1091–1096. doi:10.1002/cncr.28575
- 353 21. Burchard EG, Oh SS, Foreman MG, Celedón JC. Moving toward *True* Inclusion of  
354 Racial/Ethnic Minorities in Federally Funded Studies. A Key Step for Achieving  
355 Respiratory Health Equality in the United States. Am J Respir Crit Care Med.  
356 2015;191: 514–521. doi:10.1164/rccm.201410-1944PP

- 357 22. American Cancer Society. Cancer Facts & Figures 2014. Atlanta: American Cancer  
358 Society; 2014.
- 359 23. Murthy VH, Krumholz HM, Gross CP. Participation in cancer clinical trials: race-,  
360 sex-, and age-based disparities. JAMA: The Journal of the American Medical  
361 Association. 2004;291: 2720–2726. doi:10.1001/jama.291.22.2720
- 362 24. Chow EA, Foster H, Gonzalez V, McIver L. The Disparate Impact of Diabetes on  
363 Racial/Ethnic Minority Populations. Clinical Diabetes. 2012;30: 130–133.  
364 doi:10.2337/diaclin.30.3.130
- 365 25. Sardar MR, Badri M, Prince CT, Seltzer J, Kowey PR. Underrepresentation of  
366 women, elderly patients, and racial minorities in the randomized trials used for  
367 cardiovascular guidelines. JAMA Intern Med. American Medical Association;  
368 2014;174: 1868–1870. doi:10.1001/jamainternmed.2014.4758
- 369 26. LaVeist TA, Gaskin D, Richard P. Estimating the economic burden of racial health  
370 inequalities in the United States. Int J Health Serv. 2011;41: 231–238.  
371 doi:10.2190/HS.41.2.c
- 372 27. National Prevention Council. National Prevention Strategy. Washington, DC: US  
373 Department of Health and Human Services, Office of the Surgeon General; 2011.
- 374 28. Wendler D, Kington R, Madans J, Van Wye G, Christ-Schmidt H, Pratt LA, et al.  
375 Are racial and ethnic minorities less willing to participate in health research?  
376 PLoS Med. 2006;3: e19. doi:10.1371/journal.pmed.0030019
- 377 29. Powe NR, Gary TL. Clinical Trials. In: Beech BM, Goodman M, editors. Race &  
378 Research: Perspectives on Minority Participation in Health Studies. Washington,  
379 DC: American Public Health Association Press; 2004. pp. 61–78.
- 380 30. Durant RW, Wenzel JA, Scarinci IC, Paterniti DA, Fouad MN, Hurd TC, et al.  
381 Perspectives on barriers and facilitators to minority recruitment for clinical trials  
382 among cancer center leaders, investigators, research staff, and referring clinicians:  
383 enhancing minority participation in clinical trials (EMPaCT). Cancer. 2014;120  
384 Suppl 7: 1097–1105. doi:10.1002/cncr.28574
- 385 31. George S, Duran N, Norris K. A systematic review of barriers and facilitators to  
386 minority research participation among African Americans, Latinos, Asian  
387 Americans, and Pacific Islanders. Am J Public Health. 2014;104: e16–31.  
388 doi:10.2105/AJPH.2013.301706
- 389 32. Sharrocks K, Spicer J, Camidge DR, Papa S. The impact of socioeconomic status  
390 on access to cancer clinical trials. Br J Cancer. 2014;111: 1684–1687.  
391 doi:10.1038/bjc.2014.108
- 392 33. Maxwell AE, Bastani R, Vida P, Warda US. Strategies to recruit and retain older  
393 Filipino-American immigrants for a cancer screening study. J Community Health.

- 394 2005;30: 167–179. doi:10.1007/s10900-004-1956-0
- 395 34. Johnson VA, Edwards KA, Sherman SL, Stephens LD, Williams W, Adair A, et al.  
396 Decisions to participate in fragile X and other genomics-related research: Native  
397 American and African American voices. *J Cult Divers*. 2009;16: 127–135.
- 398 35. Association of American Medical Colleges. The Diversity Research Forum: The  
399 Importance and Benefits of Diverse Faculty in Academic Medicine: Implications  
400 for Recruitment, Retention, and Promotion. Washington, DC; 2009.
- 401 36. National Science Foundation. Doctorate recipients from U.S. colleges and  
402 universities [Internet]. [cited 11 Sep 2015]. Available:  
403 <http://www.nsf.gov/statistics/sed/2013/data/tab24.pdf>
- 404 37. Rockey S. Diversity—Looking at the Numbers [Internet]. [cited 24 Sep 2014].  
405 Available: [http://nexus.od.nih.gov/all/2012/07/20/diversity-looking-at-the-](http://nexus.od.nih.gov/all/2012/07/20/diversity-looking-at-the-numbers)  
406 [numbers](http://nexus.od.nih.gov/all/2012/07/20/diversity-looking-at-the-numbers)
- 407 38. Rockey S. New NIH Study on Diversity [Internet]. [cited 23 Sep 2014]. Available:  
408 <http://nexus.od.nih.gov/all/2011/08/18/new-nih-study-on-diversity/>
- 409 39. Ginther DK, Schaffer WT, Schnell J, Masimore B, Liu F, Haak LL, et al. Race,  
410 ethnicity, and NIH research awards. *Science*. 2011;333: 1015–1019.  
411 doi:10.1126/science.1196783
- 412 40. Freedom of Information Act Request. NIH/Office of Extramural Research. 2014.
- 413 41. Reardon S. NIH to probe racial disparity in grant awards. *Nature*. 2014;512: 243–  
414 243. doi:10.1038/512243a
- 415 42. NIH VideoCast - Advisory Committee to the Director - December 2014 (Day 1)  
416 [Internet]. [cited 18 Dec 2014]. Available:  
417 <http://videocast.nih.gov/summary.asp?live=15269&bhcp=1>
- 418 43. National Research Council, Committee on the Science of Team Science.  
419 Enhancing the Effectiveness of Team Science. Cooke NJ, Hilton ML, editors.  
420 Washington (DC): National Academies Press (US); 2015.
- 421 44. Freeman RB, Huang W. Collaboration: Strength in diversity. *Nature*. 2014;513:  
422 305. doi:10.1038/513305a
- 423 45. Tabak LA, Collins FS. Weaving a richer tapestry in biomedical science. *Science*.  
424 2011;333: 940–941. doi:10.1126/science.1211704
- 425 46. Request for Information: NIH Precision Medicine Cohort. 2015. Available:  
426 <http://grants.nih.gov/grants/guide/notice-files/NOT-OD-15-096.html>
- 427 47. Collins FS, Varmus H. A new initiative on precision medicine. *N Engl J Med*.  
428 2015;372: 793–795. doi:10.1056/NEJMp1500523

- 429 48. NIH Precision Medicine Initiative [Internet]. [cited 1 Sep 2015]. Available:  
430 <http://www.nih.gov/precisionmedicine/events.htm>
- 431 49. *ACD Precision Medicine Initiative Working Group Public Workshop*. Participant  
432 Engagement and Health Equity Workshop Summary [Internet]. [cited 1 Sep  
433 2015]. Available: [http://www.nih.gov/precisionmedicine/2015-07-01-workshop-](http://www.nih.gov/precisionmedicine/2015-07-01-workshop-summary.pdf)  
434 [summary.pdf](http://www.nih.gov/precisionmedicine/2015-07-01-workshop-summary.pdf)
- 435 50. PA-15-034: Administrative Supplements for Research on Sex/Gender Differences  
436 (Admin Supp) [Internet]. [cited 30 Dec 2014]. Available:  
437 <http://grants.nih.gov/grants/guide/pa-files/PA-15-034.html>
- 438 51. Rockey S. New Efforts to Maximize Fairness in NIH Peer Review [Internet]. [cited  
439 23 Sep 2014]. Available: [http://nexus.od.nih.gov/all/2014/05/29/new-efforts-to-](http://nexus.od.nih.gov/all/2014/05/29/new-efforts-to-maximize-fairness-in-nih-peer-review/)  
440 [maximize-fairness-in-nih-peer-review/](http://nexus.od.nih.gov/all/2014/05/29/new-efforts-to-maximize-fairness-in-nih-peer-review/)
- 441 52. CSR Announces Winners of its America COMPETES Challenges to Maximize  
442 Fairness in NIH Peer Review, [Internet]. [cited 14 Dec 2014]. Available:  
443 <http://public.csr.nih.gov/Documents/LearnMoreabouttheWinningIdeas.pdf>
- 444 53. NIH proposes critical initiatives to sustain future of U.S. biomedical research  
445 [Internet]. [cited 1 Sep 2015]. Available:  
446 <http://www.nih.gov/news/health/dec2012/od-07.htm>
- 447 54. Enhancing the Diversity of the NIH-Funded Workforce [Internet]. [cited 16 Dec  
448 2014]. Available: <http://commonfund.nih.gov/diversity/Initiatives>
- 449 55. King G. Institutional racism and the medical/health complex: a conceptual  
450 analysis. *Ethnicity & disease*. 1996;6: 30–46.
